# Supplementary material for: Advanced glycation end-products decreases expression of endothelial nitric oxide synthase through oxidative stress in human coronary artery endothelial cells
Source: PubMed Central journal article supplement (PMC5397770; doi:10.1186/s12933-017-0531-9), 2017-04-20
Supplement: 12933_2017_531_MOESM1_ESM.pdf [file 12933_2017_531_MOESM1_ESM.pdf]

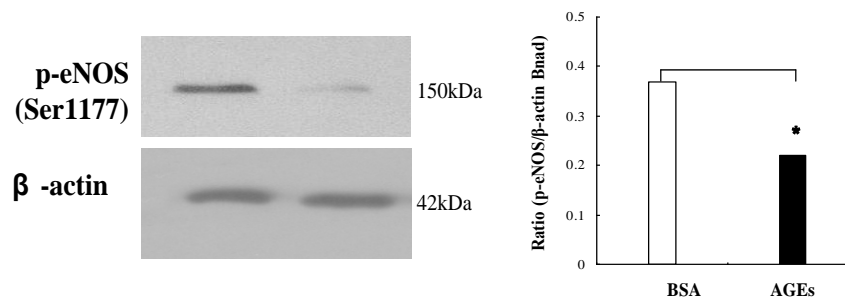

**Supplementary Fig. S1 Effects of AGEs on eNOS protein levels and NOS activity in HCAECs.** Western blot analysis. Cells were treated with 100ug/l AGEs for 24 h. Representative bands of p-eNOS (SER1177) and β-actin staining and quantitation of band density ratios. Full-length blots are presented. \* $P < 0.05$  compare with control,  $n = 3$  experiments. Data are means and SE of multiple experiments (n).
